# Supplementary material
Source: publisher figshare collection journal article supplement (https://future-science-group.figshare.com/ndownloader/files/31485710)
Supplement: Supplementary file 1 [file 31485710]

## Sheet: Sheet1
GEO database integrated analysis
Gene	logFC	P.Value	adj.P.Val		Critical Genes	logFC
GABRB2	5.01213	3.67644e-69	1.35466e-64		TENM1	3.73512
HMGA2	4.31132	6.90962e-65	4.19759e-61		PRR15	4.04163
ZCCHC12	4.27475	4.96076e-58	5.11754e-55		GABRB2	5.01213
PRR15	4.04163	3.79e-64	1.59399e-60		LRP4	3.64863
TFF3	-3.82348	6.61614e-61	1.24737e-57		PKHD1L1	-3.50305
CHI3L1	3.7696	4.21335e-38	3.61073e-36		TFF3	-3.82348
TENM1	3.73512	2.48808e-68	3.4009e-64
GABRB2	3.65403	6.21792e-63	1.86343e-59
LRP4	3.64863	9.3145e-65	5.0927e-61
SYTL5	3.57722	4.75887e-59	5.65633e-56
CLDN1	3.51453	9.83146e-53	4.55538e-50
PKHD1L1	-3.50305	2.33116e-50	7.63209e-48
CITED1	3.43786	3.58529e-58	3.76972e-55
ARHGAP36	3.43546	3.67058e-26	1.04254e-24
SERPINA1	3.43506	1.31454e-56	1.07272e-53
LRRK2	3.38627	6.49437e-60	1.01451e-56
CHI3L1	3.36017	4.20273e-39	4.0455e-37
TPO	-3.35206	3.14248e-47	7.01286e-45
DPP4	3.33048	1.09572e-62	2.85277e-59
DIO1	-3.31868	3.40378e-38	2.95869e-36
SCEL	3.26437	1.92843e-55	1.35176e-52
ADH1B	-3.22088	2.00412e-52	8.98159e-50
SCEL	3.21011	5.13479e-54	2.92442e-51
TACSTD2	3.18813	2.07829e-40	2.25011e-38
SERPINA1	3.13175	1.8371e-59	2.51109e-56
MPPED2	-3.07554	9.3109e-53	4.42673e-50
DPP4	3.06521	4.05648e-67	3.69646e-63
CYP1B1	3.00584	2.45062e-40	2.63237e-38
DPP6	-3.00126	9.39527e-53	4.42833e-50
